# Supplementary material for: Relationship Between Oral Semaglutide Tablet Erosion and Pharmacokinetics: A Pharmacoscintigraphic Study
Source: PubMed Central journal article supplement — Clin Pharmacol Drug Dev. 2021 Mar 22;10(5):453–62. doi: 10.1002/cpdd.938 (PMC8251533; doi:10.1002/cpdd.938), 2021-03-22
Supplement: CPDD-10-453-s001.pdf [file CPDD-10-453-s001.pdf]

**Relationship Between Oral Semaglutide Tablet Erosion and Pharmacokinetics: A  
Pharmacoscintigraphic Study**

Tine A. Bækdal, Morten Donsmark, Marie-Louise Hartoft-Nielsen, Flemming L. Søndergaard,  
Alyson Connor

**Supplementary Online Material**

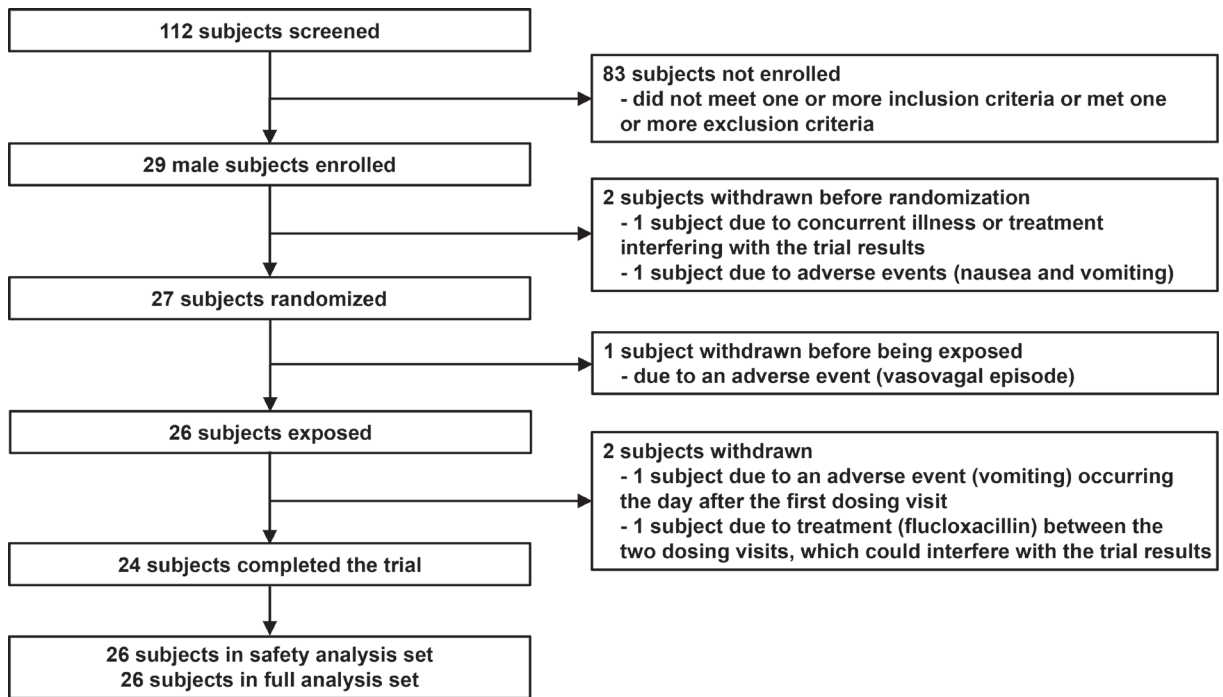

**Fig. S1** Subject disposition.

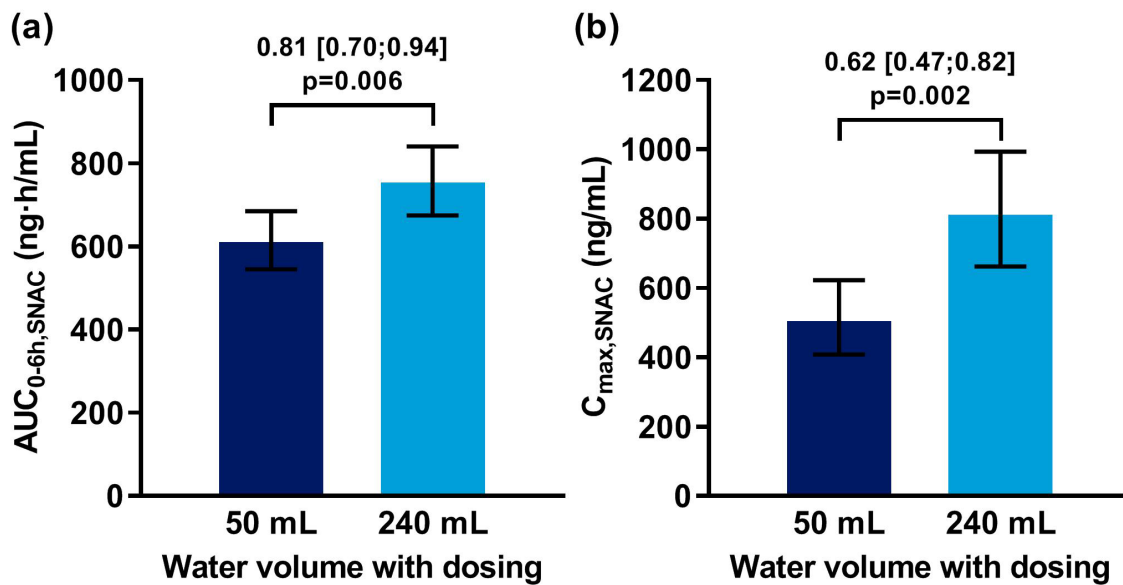

**Fig. S2** Effect of water volume with dosing on (a)  $AUC_{0-6h,SNAC}$  and (b)  $C_{max,SNAC}$  after a single dose of 10 mg oral semaglutide in healthy male subjects.

Bars are estimated means and 95% confidence intervals. Treatment comparisons show estimated treatment ratios [95% confidence interval] and p-value. Endpoints were analyzed on logarithmic scale but are presented on linear scale. n=24 (50 mL) or n=26 (240 mL).  $C_{max}$ , maximum concentration.
